# Supplementary material
Source: PubMed Central journal article supplement (PMC8491572)
Supplement: NIHMS1743451-supplement-Supporting_materials_and_figures.pdf [file NIHMS1743451-supplement-Supporting_materials_and_figures.pdf]

**Supporting Information for**

# Dual Functional Lipid Coating for Nanopillar-based Capture of Circulating Tumor Cells with High Purity and Efficiency

*Hsin-Ya Lou<sup>1#</sup>, Wenting Zhao<sup>2#</sup>, Lindsey Hanson<sup>1&</sup>, Connie Zeng<sup>1</sup>, Yi Cui<sup>2, 3</sup>, Bianxiao Cui<sup>1,\*</sup>*

<sup>1</sup>Department of Chemistry, Stanford University, 380 Roth Way, Stanford, California 94305, United States.

<sup>2</sup>Department of Materials Science and Engineering, Stanford University, 476 Lomita Mall, Stanford, California 94305, United States.

<sup>3</sup>Stanford Institute for Materials and Energy Sciences, SLAC National Accelerator Laboratory, 2575 Sand Hill Rd, Menlo Park, California 94025, United States.

\*To whom correspondences should be addressed

\*E-mail: [bcui@stanford.edu](mailto:bcui@stanford.edu).

& Current address: Materials Sciences Division, Lawrence Berkeley National Laboratory, 1 Cyclotron Rd, Berkeley, CA 94720

#These authors contribute equally to this work.

**Table S1**

The geometry of quartz nanopillar arrays:

| Pillar Diameter<br>(nm) | Pillar Spacing<br>( $\mu\text{m}$ ) | Abbreviation |
|-------------------------|-------------------------------------|--------------|
| 500                     | 20                                  | d500p20      |
| 700                     | 20                                  | d700p20      |
| 1000                    | 20                                  | d1000p20     |
| 500                     | 10                                  | d500p10      |
| 700                     | 10                                  | d700p10      |
| 1000                    | 10                                  | d1000p10     |
| 500                     | 5                                   | d500p5       |
| 700                     | 5                                   | d700p5       |
| 1000                    | 5                                   | d1000p5      |
| 500                     | 3                                   | d500p3       |
| 700                     | 3                                   | d700p3       |
| 1000                    | 3                                   | d1000p3      |

**Table S2**

The relative surface area of quartz nanopillar arrays (Pillar height: 1.05  $\mu\text{m}$ )

| Pillar Geometry | Calculated total surface area<br>( $\mu\text{m}^2/\text{array}$ ) | Relative surface area |
|-----------------|-------------------------------------------------------------------|-----------------------|
| Flat            | 10000                                                             | 1                     |
| d500p20         | 10041.23                                                          | 1.004123              |
| d700p20         | 10057.73                                                          | 1.005773              |
| d1000p20        | 10082.47                                                          | 1.008247              |
| d500p10         | 10164.93                                                          | 1.016493              |
| d700p10         | 10230.91                                                          | 1.023091              |
| d1000p10        | 10329.87                                                          | 1.032987              |
| d500p5          | 10659.73                                                          | 1.065973              |
| d700p5          | 10923.63                                                          | 1.092363              |
| d1000p5         | 11319.47                                                          | 1.131947              |
| d500p3          | 11832.6                                                           | 1.18326               |
| d700p3          | 12565.63                                                          | 1.256563              |
| d1000p3         | 13665.19                                                          | 1.366519              |

**Movie S1: FRAP of supported lipid bilayer**

**Movie S2: FRAP of SA-488 on supported lipid bilayer**

**Movie S3: Clustering of SA-488 beneath the captured MCF7 cells**

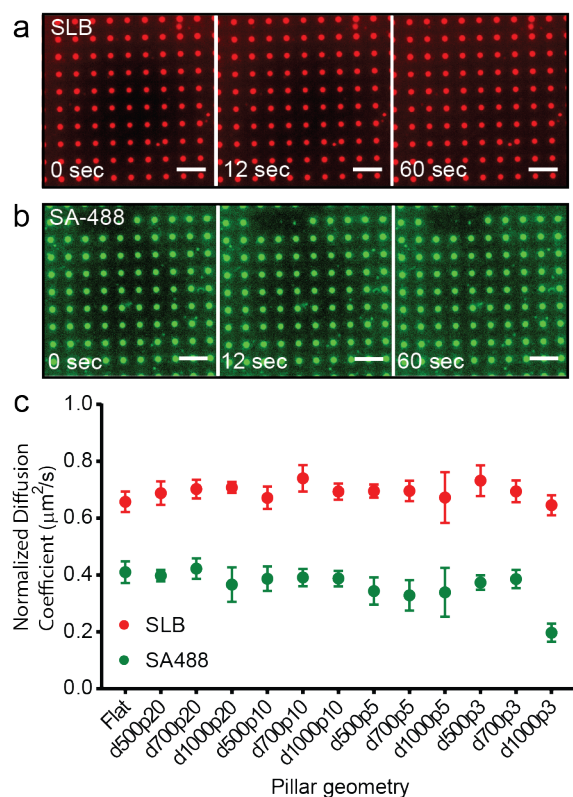

**Figure S1.** Fluidity of both the lipid molecules and streptavidin molecules on the supported lipid bilayers. **a-b.** FRAP experiment images of lipid (a) and SA-488 (b) on SLB formed on quartz nanopillars. Images were taken directly after bleaching (0sec). (Scale bars  $5\mu\text{m}$ ) **c.** Normalized diffusion coefficients of SLB and SA-488 on the SLB of all quartz nanopillar arrays. (Every experiment was repeated for 3 times ( $n = 3$ ) and error bars represent the standard deviation (SD).)

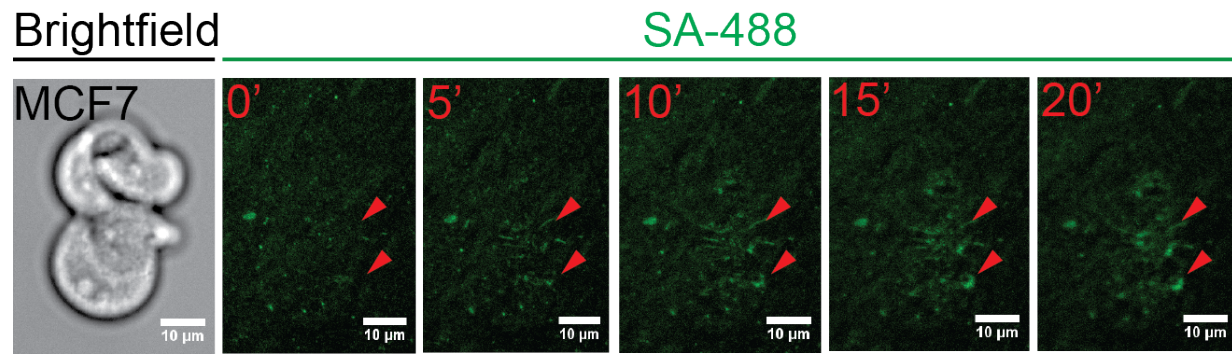

**Figure S2.** The clustering of anti-EpCAM formed beneath captured MCF7 cells on lipid-coated flat surface happened within 20-min incubation (indicated by red arrows).

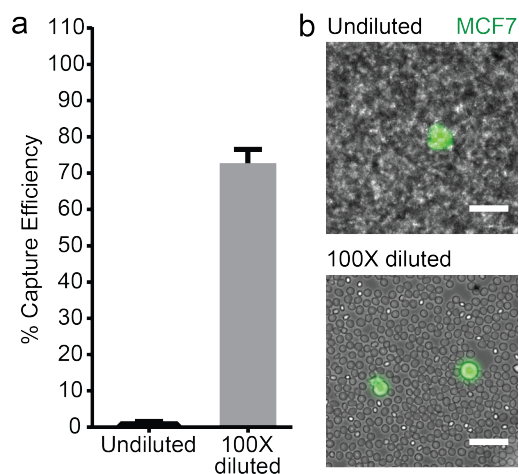

**Figure S3.** Capturing spiked MCF7 on lipid-coated quartz nanopillar arrays in undiluted and 100X diluted human whole blood. **a.** The capture efficiency of non-diluted blood is  $0.6 \pm 1.0\%$ , while using 100X diluted blood we could get capture efficiency of  $72.8 \pm 3.8\%$ . ( $n=3$ , the error bars represent standard deviation, SD) **b.** Blood cells and MCF7 cells (stained with Celcein-AM, green) on the anti-EpCAM functionalized support lipid bilayers. For undiluted blood, blood cells formed multi-layers on the SLB and overlapped with MCF7 cells. For 100X diluted blood, blood cells formed monolayer and had no overlap with MCF7 cells. (Scale bar 20  $\mu\text{m}$ )

MCF7

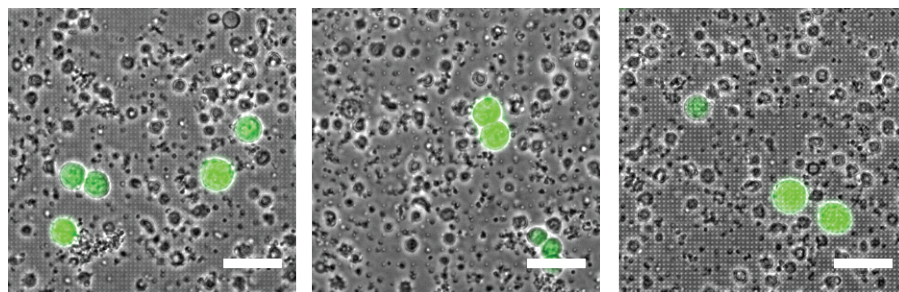

**Figure S4.** Three typical images of MCF7-spiked isolated PBMCs samples plated on lipid-coated quartz nanopillar arrays. It was showed that PBMCs had less or no overlap with MCF7 cells (stained with Celcein-AM, green). (Scale bar 40  $\mu\text{m}$ )

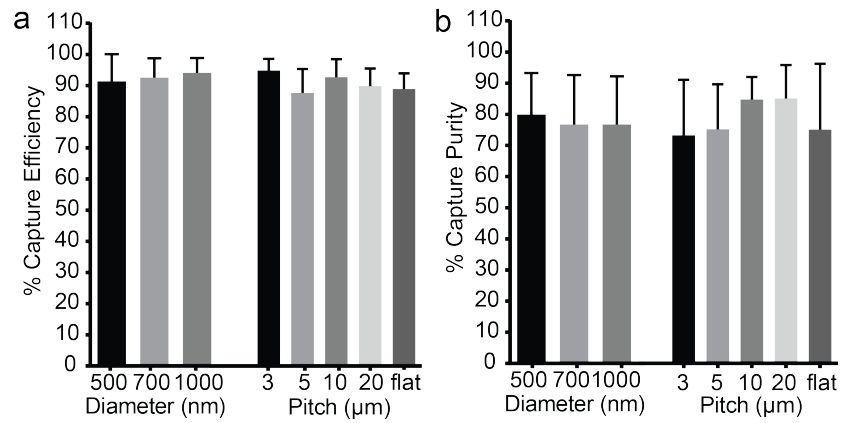

**Figure S5.** Capture efficiency (a) and capture purity (b) of spiked MCF7 cells in isolated PBMCs using quartz nanopillar arrays different diameters and pitches (n=6, the error bars represent standard deviation, SD).
